# Supplementary material for: A major waterfall landscape maintained by fog drip water
Source: Copernicus journal article supplement (doi:10.5194/hess-2018-37), 2018-02-09
Supplement: Supplementary file 1 [file Supporting Information_database.xlsx]

## Sheet: Chishui River basin(2011.6)
	Water Type	Sampling Date	Longitude (°E)	Latitude (°N)	Elevation (m.a.s.l)	Distance from the Source (km)	δ2H-vsmow (‰)	δ18O-vsmow (‰)	d-excess (‰)
Main stream of Chishui River	River	2011.6.7	105.217	27.7574	836	80	-53.6	-8.42	13.76
	River	2011.6.8	104.915	27.5923	1455	20	-55.6	-8.635	13.48
	River	2011.6.8	105.029	27.6272	1202	40	-55.4	-8.751	14.608
	River	2011.6.8	105.437	27.7786	654	109	-51.6	-8.103	13.224
	River	2011.6.8	105.306	27.7094	763	91	-52.3	-7.995	11.66
	River	2011.6.9	106.002	28.2665	280	304	-46.9	-7.062	9.596
	River	2011.6.9	105.579	27.7242	620	126	-52.9	-8.108	11.964
	River	2011.6.10	105.683	28.5639	226	372	-41.1	-6.321	9.468
	River	2011.6.10	105.847	28.4806	255	345	-49.5	-7.651	11.708
	River	2011.6.10	105.948	28.3618	258	317	-46.7	-7.104	10.132
	River	2011.6.10	106.036	28.1411	306	285	-46.3	-6.981	9.548
	River	2011.6.10	106.371	27.8587	410	225	-49.1	-7.455	10.54
Branches of Chishui River	Stream	2011.6.5	106.371	27.7779	628	220	-42.4	-6.038	5.904
	Stream	2011.6.5	106.06	27.6986	589	181	-44.4	-6.836	10.288
	Stream	2011.6.5	106.232	27.6967	534	206	-49.8	-7.882	13.256
	Stream	2011.6.5	106.257	27.6438	614	206	-49.4	-7.67	11.96
	Stream	2011.6.6	105.909	27.7078	497	174	-52.8	-8.148	12.384
	Stream	2011.6.6	105.847	27.674	556	174	-52.9	-8.207	12.756
	Stream	2011.6.7	105.257	27.7924	886	78	-47.1	-7.898	16.084
	Stream	2011.6.8	105.032	27.6806	1107	48	-55.7	-8.632	13.356
	Stream	2011.6.8	105.203	27.7438	981	78	-57.3	-8.525	10.9
	Stream	2011.6.9	105.707	27.9109	1016	157	-49.6	-7.764	12.512
	Stream	2011.6.9	105.805	27.9923	576	285	-43.9	-6.736	9.988
	Stream	2011.6.9	105.941	28.0971	368	285	-38.4	-5.665	6.92
	Stream	2011.6.9	105.992	28.2105	351	302	-35.8	-5.987	12.096
	Fengxi Stream	2011.6.9	105.754	28.4447	325	355	-35.9	-6.932	19.556
	Waterfall	2011.6.9	105.754	28.4443	328	355	-33.5	-6.388	17.604
	Waterfall	2011.6.9	105.747	28.4114	433	355	-30.5	-5.81	15.98
	Waterfall	2011.6.9	105.744	28.3825	539	355	-34.7	-6.323	15.884
	Stream	2011.6.10	106.204	28.1391	337	266	-46.6	-7.431	12.848
	Datong Stream	2011.6.10	105.69	28.4489	303	368	-31.6	-5.768	14.544
	Spring	2011.6.10	105.69	28.4489	303	368	-30.9	-5.956	16.748
	Spring	2011.6.10	105.692	28.4534	434	368	-31.8	-6.176	17.608
	Stream	2011.6.11	106.506	27.9663	1000	266	-44.2	-6.954	11.432
	Stream	2011.6.11	106.508	27.9583	975	266	-50.8	-8.369	16.152
	Stream	2011.6.12	106.787	27.8784	903	266	-47.3	-7.788	15.004

## Sheet: Forest catchment(2014.12)
Water Type	Sampling Date	Longitude (°E)	Latitude (°N)	Elevation (m.a.s.l)	δ2H-vsmow (‰)	δ18O-vsmow (‰)	d-excess (‰)
Fog drip	2014.12.22	105.635	28.4387	465	7.3	-3.24	33.22
	2014.12.22	105.642	28.4335	523	24.3	0.56	19.82
	2014.12.22	105.647	28.4244	645	29.5	0.6	24.7
	2014.12.22	105.647	28.4243	654	22.7	-1.06	31.18
	2014.12.22	105.646	28.425	589	3.5	-2.41	22.78
	2014.12.23	105.657	28.4883	250	20	-1.04	28.32
	2014.12.23	105.681	28.4569	306	26.4	-0.19	27.92
	2014.12.23	105.694	28.4126	500	30.2	0.07	29.64
	2014.12.23	105.701	28.4019	689	31.5	0.93	24.06
	2014.12.23	105.703	28.3945	856	28	-0.3	30.4
	2014.12.24	105.777	28.3642	752	9.3	-2.48	29.14
	2014.12.24	105.766	28.3582	923	8.3	-3.62	37.26
	2014.12.24	105.771	28.3529	1088	19.7	-1.2	29.3
	2014.12.24	105.769	28.3378	1140	21.2	-2.44	40.72
	2014.12.25	105.725	28.387	874	18.6	-1.93	34.04
	2014.12.25	105.74	28.4298	406	21.3	-1.05	29.7
	2014.12.25	105.734	28.4284	563	26.6	0.47	22.84
	2014.12.25	105.734	28.4276	604	7.5	-2.41	26.78
Spring	2014.12.22	105.642	28.4335	523	-33.6	-5.74	12.32
	2014.12.22	105.643	28.4302	539	-36.6	-6.06	11.88
	2014.12.22	105.634	28.4403	451	-31.8	-6.09	16.92
	2014.12.22	105.638	28.4435	423	-34.7	-6.14	14.42
	2014.12.22	105.639	28.4448	415	-36.6	-6.25	13.4
	2014.12.22	105.64	28.4454	425	-35.5	-6.35	15.3
	2014.12.22	105.646	28.4591	351	-36.1	-6.36	14.78
	2014.12.23	105.703	28.3945	856	-37.6	-6.79	16.72
	2014.12.23	105.709	28.3678	1090	-46.1	-7.91	17.18
	2014.12.23	105.737	28.3629	673	-32.9	-5.63	12.14
	2014.12.23	105.743	28.3674	698	-36.6	-6.25	13.4
	2014.12.24	105.754	28.3859	623	-40.5	-6.93	14.94
	2014.12.24	105.76	28.356	980	-41.8	-7.4	17.4
	2014.12.24	105.77	28.3544	1099	-41.5	-7.25	16.5
	2014.12.24	105.769	28.3392	1152	-43	-7.54	17.32
	2014.12.25	105.746	28.4155	432	-39.3	-6.73	14.54
	2014.12.25	105.734	28.4298	482	-36.5	-6.44	15.02
Stream	2014.12.22	105.634	28.4737	258	-34.8	-6.5	17.2
	2014.12.22	105.644	28.4262	567	-38.8	-7.18	18.64
	2014.12.22	105.642	28.4334	516	-37.8	-6.7	15.8
	2014.12.22	105.64	28.435	489	-38.7	-6.83	15.94
	2014.12.22	105.635	28.4382	472	-37.6	-6.72	16.16
	2014.12.23	105.679	28.51	235	-37	-6.75	17
	2014.12.23	105.657	28.4883	250	-35.2	-6.3	15.2
	2014.12.23	105.681	28.4569	306	-35	-6.32	15.56
	2014.12.23	105.737	28.3617	678	-37.7	-6.64	15.42
	2014.12.24	105.753	28.3857	608	-39.4	-6.55	13
	2014.12.24	105.778	28.3645	750	-40.3	-6.98	15.54
	2014.12.25	105.74	28.4298	406	-40.8	-6.97	14.96
	2014.12.25	105.736	28.4304	470	-36.4	-6.49	15.52
	2014.12.25	105.75	28.4453	377	-44.8	-7.77	17.36
	2014.12.26	105.787	28.4956	280	-35.8	-6.28	14.44
	2014.12.26	105.856	28.4834	312	-38	-6.69	15.52
	2014.12.26	105.903	28.4933	260	-34	-5.94	13.52
	2014.12.26	105.942	28.4831	270	-34.7	-6.05	13.7
	2014.12.26	105.97	28.4551	280	-32.9	-6.24	17.02
	2014.12.26	105.945	28.4032	308	-36.8	-6.7	16.8
	2014.12.26	105.963	28.3484	275	-37.2	-6.53	15.04
	2014.12.26	105.928	28.3662	295	-37.1	-6.12	11.86
	2014.12.26	105.821	28.4673	281	-39.5	-7	16.5
Waterfall	2014.12.22	105.644	28.4266	561	-37.4	-6.44	14.12
	2014.12.22	105.64	28.4353	490	-37.7	-6.85	17.1
	2014.12.22	105.636	28.4421	446	-37.6	-6.62	15.36
	2014.12.22	105.642	28.4497	385	-36.6	-6.59	16.12
	2014.12.22	105.647	28.4587	352	-34.6	-6.12	14.36
	2014.12.22	105.646	28.4632	325	-37	-6.46	14.68
	2014.12.23	105.74	28.3591	719	-45.5	-7.74	16.42
	2014.12.23	105.74	28.369	678	-43.6	-6.84	11.12
	2014.12.23	105.745	28.383	565	-38.1	-6.75	15.9
	2014.12.24	105.768	28.3604	881	-41.8	-7.47	17.96
	2014.12.25	105.738	28.3887	677	-42.2	-7.19	15.32
	2014.12.25	105.742	28.396	549	-40.6	-6.66	12.68
	2014.12.25	105.736	28.4285	615	-33	-6.04	15.32
	2014.12.25	105.734	28.4285	562	-38.5	-6.71	15.18
	2014.12.25	105.732	28.4271	613	-36.4	-6.24	13.52
River	2014.12.26	105.684	28.5646	222	-47.4	-7.45	12.2
	2014.12.26	105.764	28.4854	243	-49.1	-7.6	11.7
	2014.12.26	105.84	28.4783	247	-49.2	-7.62	11.76
	2014.12.26	105.965	28.455	268	-49.4	-7.64	11.72
	2014.12.26	105.95	28.3595	278	-49.5	-7.65	11.7
	2014.12.26	105.734	28.5226	236	-48.3	-7.52	11.86
	2014.12.26	105.698	28.5932	221	-47.3	-7.44	12.22

## Sheet: Datong and Fengxi streams(2015)
Stream	Sampling Date	δ2H-vsmow (‰)	δ18O-vsmow (‰)	d-excess (‰)
Datong Stream	2015.6.3	-21.9	-4.6	14.9
	2015.6.17	-27.3	-5.24	14.62
	2015.7.2	-33	-5.75	13
	2015.7.17	-33.6	-6.06	14.88
	2015.8.3	-48.2	-7.89	14.92
	2015.8.18	-46.2	-7.25	11.8
	2015.9.2	-42.5	-7.26	15.58
	2015.9.16	-49.3	-8.12	15.66
	2015.10.3	-40.9	-6.81	13.58
	2015.10.16	-36.1	-6.26	13.98
	2015.11.3	-36.2	-6.34	14.52
	2015.11.17	-36.2	-6.31	14.28
	2015.12.6	-36	-6.42	15.36
	2015.12.18	-36.2	-6.5	15.8
Fengxi Stream	2015.6.3	-31.7	-5.97	16.06
	2015.6.17	-32.9	-6.11	15.98
	2015.7.2	-35.8	-6.43	15.64
	2015.7.17	-34	-5.89	13.12
	2015.8.3	-59	-8.65	10.2
	2015.8.18	-48.4	-7.63	12.64
	2015.9.2	-43.3	-7.18	14.14
	2015.9.16	-48	-7.82	14.56
	2015.10.3	-45.4	-7.47	14.36
	2015.10.16	-42.8	-7.23	15.04
	2015.11.3	-42.7	-7.2	14.9
	2015.11.17	-42.7	-7.19	14.82
	2015.12.6	-43	-7.29	15.32
	2015.12.17	-42.4	-7.23	15.44

## Sheet: Monthly rainfall isotopes(2015)
Month	δ2H-vsmow (‰)	δ18O-vsmow (‰)	d-excess (‰)	Precipitation(mm)
Jan	-20.8	-5.4	22.4	21.1
Feb	-17.4	-3.61	11.48	18
Mar	-14	-3.62	14.96	41.7
Apr	-25.1	-5.47	18.66	87.9
May	-27.3	-4.84	11.42	134.6
Jun	-45	-6.79	9.32	171.8
Jul	-75.9	-10.84	10.82	217.2
Aug	-73.6	-10.33	9.04	167.3
Sep	-79.5	-11.3	10.9	102.1
Oct	-43.7	-7.17	13.66	112.7
Nov	-40.2	-6.82	14.36	16.5
Dec	-16	-3.84	14.72	31.1

## Sheet: Estimation of X value
	Baseflow (‰)		VMW of Rainwater (‰)		Fog water (‰)		Fog water proportion X (%)
	δ2H-vsmow	δ18O-vsmow	δ2H-vsmow	δ18O-vsmow	δ2H-vsmow	δ18O-vsmow	By δ2H-vsmow	By δ18O-vsmow
Datong catchment	-36.2	-6.5	-51.6	-7.94	7.3	-3.24	26.146	30.6383
	-36.2	-6.5	-51.6	-7.94	24.3	0.56	20.2899	16.9412
	-36.2	-6.5	-51.6	-7.94	29.5	0.6	18.9889	16.8618
	-36.2	-6.5	-51.6	-7.94	22.7	-1.06	20.7268	20.9302
	-36.2	-6.5	-51.6	-7.94	3.5	-2.41	27.9492	26.0398
	-36.2	-6.5	-51.6	-7.94	20	-1.04	21.5084	20.8696
	-36.2	-6.5	-51.6	-7.94	26.4	-0.19	19.7436	18.5806
	-36.2	-6.5	-51.6	-7.94	30.2	0.07	18.8264	17.9775
	-36.2	-6.5	-51.6	-7.94	31.5	0.93	18.5319	16.2345
	-36.2	-6.5	-51.6	-7.94	28	-0.3	19.3467	18.8482
Fengxi catchment	-42.4	-7.23	-51.6	-7.94	9.3	-2.48	15.1067	13.0037
	-42.4	-7.23	-51.6	-7.94	8.3	-3.62	15.3589	16.4352
	-42.4	-7.23	-51.6	-7.94	19.7	-1.2	12.9032	10.5341
	-42.4	-7.23	-51.6	-7.94	21.2	-2.44	12.6374	12.9091
	-42.4	-7.23	-51.6	-7.94	18.6	-1.93	13.1054	11.8136
	-42.4	-7.23	-51.6	-7.94	21.3	-1.05	12.62	10.3048
	-42.4	-7.23	-51.6	-7.94	26.6	0.47	11.7647	8.44233
	-42.4	-7.23	-51.6	-7.94	7.5	-2.41	15.5668	12.8391
